# Supplementary material
Source: PubMed Central journal article supplement (PMC3498977)

## Supporting Information

### The Element Effect Revisited: Factors Determining Leaving Group Ability in Activated Nucleophilic Aromatic Substitution Reactions

Nicholas A. Senger<sup>†</sup>, Bo Bo<sup>†</sup>, Qian Cheng<sup>†</sup>, James R. Keeffe<sup>†,\*</sup> Scott Gronert<sup>‡</sup> and  
Weiming Wu<sup>†,\*</sup>

<sup>†</sup>Department of Chemistry and Biochemistry, San Francisco State University, San Francisco, CA  
94132

<sup>‡</sup>Department of Chemistry, Virginia Commonwealth University, 1001 W. Main Street,  
Richmond, Virginia 23284.

\*Corresponding Authors: [wuw@sfsu.edu](mailto:wuw@sfsu.edu), [keeffe@sfsu.edu](mailto:keeffe@sfsu.edu)

#### Table of Contents

|                                                                                                                                                      |     |
|------------------------------------------------------------------------------------------------------------------------------------------------------|-----|
| Full Reference 33.....                                                                                                                               | S2  |
| Table S1. Rate constants for nucleophilic aromatic substitution reactions of 1-substituted-2,4-<br>dinitrobenzenes with piperidine in methanol ..... | S2  |
| Table S2. Energies and ZPVE values: 2,4-dinitrophenyl halides + amines.....                                                                          | S3  |
| Table S3. Energies, ZPVE values and $\Delta H_{\text{ADD}}$ values: addition of fluoride to aryl fluorides.....                                      | S4  |
| Table S4. Energies and ZPVE values: 2,4-dinitrophenyl halides + thiolate.....                                                                        | S5  |
| Table S5. Cartesian coordinates.....                                                                                                                 | S6  |
| <sup>1</sup> H NMR of 1,2,4-trinitrobenzene in CDCl <sub>3</sub> with 0.05% v/v TMS.....                                                             | S17 |

**Reference 33:** GAUSSIAN 03, Revision B.04, Frisch, M. J.; Trucks, G. W.; Schlegel, H. B.; Scuseria, G. E.; Robb, M. A.; Cheeseman, J. R.; Montgomery, J. A., Jr.; Vreven, T.; Kudin, K. N.; Burant, J. C.; Millam, J. M.; Iyengar, S. S.; Tomasi, J.; Barone, V.; Mennucci, B.; Cossi, M.; Scalmani, G.; Rega, N.; Petersson, G. A.; Nakatsuji, H.; Hada, M.; Ehara, M.; Toyota, K.; Fukuda, R.; Hasegawa, J.; Ishida, M.; Nakajima, T.; Honda, Y.; Kitao, O.; Nakai, H.; Klene, M.; Li, X.; Knox, J. E.; Hratchian, H. P.; Cross, J. B.; Adamo, C.; Jaramillo, J.; Gomperts, R.; Stratmann, R. E.; Yazyev, O.; Austin, A. J.; Cammi, R.; Pomelli, C.; Ochterski, J. W.; Ayala, P. Y.; Morokuma, K.; Voth, G. A.; Salvador, P.; Dannenberg, J. J.; Zakrzewski, G.; Dapprich, S.; Daniels, A. D.; Strain, M. C.; Farkas, O.; Malick, D. K.; Rabuck, A. D.; Raghavachari, K.; Foresman, J. B.; Ortiz, J. V.; Cui, Q.; Baboul, A. G.; Clifford, S.; Cioslowski, J.; Stefanov, B.; Liu, G.; Liashenko, A.; Piskorz, P.; Komaromi, I.; Martin, R. L.; Fox, D. J.; Keith, T.; Al-Laham, M. A.; Peng, C. Y.; Nanayakkara, A.; Challacombe, M.; Gill, P. M. W.; Johnson, B.; Chen, W.; Wong, M. W.; Gonzalez, C.; Pople, J. A. Gaussian, Inc., Pittsburgh PA, 2003.

\* \* \*

**Table S1. Rate constants for nucleophilic aromatic substitution reactions of 1-substituted-2,4-dinitrobenzenes with piperidine in methanol.**

| Substrates<br>(L=) | Overall<br>rate constant (0°<br>C, M <sup>-1</sup> s <sup>-1</sup> ) | Overall<br>rate constant<br>(10° C, M <sup>-1</sup> s <sup>-1</sup> ) | Overall<br>rate constant<br>(20° C, M <sup>-1</sup> s <sup>-1</sup> ) | Overall<br>rate constant<br>(30° C, M <sup>-1</sup> s <sup>-1</sup> ) |
|--------------------|----------------------------------------------------------------------|-----------------------------------------------------------------------|-----------------------------------------------------------------------|-----------------------------------------------------------------------|
| Fluoro             | 1.10                                                                 | 2.46                                                                  | 3.50                                                                  | 4.93                                                                  |
| Nitro              | —                                                                    | 0.68                                                                  | 1.00                                                                  | 1.46                                                                  |
| Chloro             | —                                                                    | 0.00536                                                               | 0.00970                                                               | 0.0158                                                                |
| Bromo              | —                                                                    | 0.00561                                                               | 0.00928                                                               | 0.0171                                                                |
| Iodo               | —                                                                    | 0.00121                                                               | 0.00217                                                               | 0.00435                                                               |

**Table S2. MP2/6-31+G\*//HF/6-31+G\* energies (hartrees) and HF/6-31+G\* zero point energies (kcal/mol) for substrates and transition states in reactions of 2,4-dinitrophenyl halides with dimethylamine (dma) and piperidine (pip).<sup>a</sup>**

| <b>Compound</b>      | <b><i>E</i> (gas)</b> | <b><i>E</i> (methanol)</b> | <b>ZPVE</b> | <b>iv (cm<sup>-1</sup>)</b> |
|----------------------|-----------------------|----------------------------|-------------|-----------------------------|
| dimethylamine (dma)  | -134.673944           | -134.6795689               | 62.28       |                             |
| piperidine (pip)     | -251.0156561          | -251.0219085               | 107.12      |                             |
| 2,4-DNP-F            | -738.5129472          | -738.5286788               | 66.54       |                             |
| 2,4-DNP-Cl           | -1098.5229472         | -1098.5376299              | 65.54       |                             |
| 2,4-DNP-Br           | -3208.9357906         | -3208.9508155              | 65.48       |                             |
| 2,4-DNP-F + dma, ts  | -873.1876515          | -873.2088138               | 130.68      | 424                         |
| 2,4-DNP-Cl + dma, ts | -1233.1898624         | -1233.2118589              | 129.70      | 445                         |
| 2,4-DNP-Br + dma, ts | -3343.6084881         | -3343.6304145              | 129.31      | 450                         |
| 2,4-DNP-F + pip, ts  | -989.5329467          | -989.5549479               | 175.23      | 387                         |
| 2,4-DNP-Cl + pip, ts | -1349.5360501         | -1349.5597727              | 174.24      | 408                         |
| 2,4-DNP-Br + pip, ts | -3459.9566101         | -3459.9790140              | 173.86      | 411                         |

<sup>a</sup>Energies in methanol were calculated as single-point energies using the optimized gas phase HF/6-31+G\* geometries. ZPVE values (unscaled) and imaginary frequencies were calculated at HF/6-31+G\*. The use of HF ZPVE values in place of MP2 ZPVE values has been found to cause insignificant differences in well over 100  $\Delta H$  calculations: see Gronert, S.; Keeffe, J. R.; *J. Org. Chem.* **2006**, *71*, 5959-5968 for example.

**Table S3. MP2/6-31+G\* energies (hartrees), ZPVE values (kcal/mol) and  $\Delta H_{\text{ADD}}$  values (kcal/mol) for addition of fluoride ion to different positions of aryl fluorides.<sup>a, b</sup>**

| <b>compound</b>                 | <b><i>E</i></b> | <b>ZPVE</b> | <b><math>\Delta H_{\text{ADD}}</math></b> |
|---------------------------------|-----------------|-------------|-------------------------------------------|
| fluoride                        | -99.6238467     | NA          |                                           |
| <u>fluorobenzene</u>            | -330.5011021    | 62.12       |                                           |
| C-1 adduct                      | -430.130422     | 61.80       | -3.7                                      |
| <u>4-nitrofluorobenzene</u>     | -534.5239818    | 64.42       |                                           |
| C-1 adduct                      | -634.1972231    | 65.15       | -30.3                                     |
| C-3 adduct                      | -634.1807831    | 65.31       | -19.9                                     |
| <u>1,3-dinitrobenzene</u>       | -639.5159168    | 72.01       |                                           |
| C-6 adduct                      | -739.1968595    | 73.25       | -34.7                                     |
| <u>2,4-dinitrofluorobenzene</u> | -738.5324912    | 66.54       |                                           |
| C-1 adduct                      | -838.2354813    | 67.61       | -48.7                                     |
| C-3 adduct                      | -838.217464     | 67.74       | -37.3                                     |
| C-5 adduct                      | -838.219161     | 67.85       | -38.2                                     |
| C-6 adduct                      | -838.2017522    | 66.99       | -28.1                                     |

<sup>a</sup>ZPVE values (unscaled) and imaginary frequencies were calculated at HF/6-31+G\*. The use of HF ZPVE values in place of MP2 ZPVE values has been found to cause insignificant differences in well over 100  $\Delta H$  calculations: see Gronert, S.; Keeffe, J. R.; *J. Org. Chem.* **2006**, *71*, 5959-5968 for example. <sup>b</sup>Reaction at sites not listed in the table resulted not in covalent complex formation, but in hydrogen bonding between substrate and fluoride.

**Table S4. MP2/6-31+G\*\*/HF/6-31+G\* energies (hartrees) and HF/6-31+G\* zero point energies (kcal/mol) for substrates and transition states in reactions of 2,4-dinitrophenyl halides with thiolate anion.<sup>a</sup>**

| <b>Compound</b>             | <b><i>E</i> (gas)</b> | <b>ZPVE</b> | <b>iv (cm<sup>-1</sup>)</b> |
|-----------------------------|-----------------------|-------------|-----------------------------|
| thiolate (SH <sup>-</sup> ) | -398.2295244          | 3.98        |                             |
| 2,4-DNP-F                   | -738.5129472          | 66.54       |                             |
| 2,4-DNP-F, ts               | -1136.7836338         | 71.17       | 269                         |
| 2,4-DNP-Cl                  | -1098.5226959         | 65.55       |                             |
| 2,4-DNP-Cl, ts              | -1496.7890490         | 70.09       | 298                         |
| 2,4-DNP-Br                  | -3208.9357906         | 65.48       |                             |
| 2,4-DNP-Br, ts              | -3607.2039139         | 69.75       | 314                         |

<sup>a</sup>ZPVE values (unscaled) and imaginary frequencies were calculated at HF/6-31+G\*. The use of HF ZPVE values in place of MP2 ZPVE values has been found to cause insignificant differences in well over 100  $\Delta H$  calculations: see Gronert, S.; Keeffe, J. R.; *J. Org. Chem.* **2006**, *71*, 5959-5968 for example.

**Table S5. Cartesian coordinates for compounds in this study.**

---

HF/6-31+G\* except where noted

dimethylamine, HF/6-31+G\*

|   |           |           |           |
|---|-----------|-----------|-----------|
| H | 1.268644  | -0.970560 | -0.762219 |
| C | 1.210898  | -0.221021 | 0.020110  |
| H | 1.272519  | -0.736018 | 0.982396  |
| H | 2.074560  | 0.426447  | -0.077794 |
| N | 0.000034  | 0.554581  | -0.144817 |
| H | 0.000157  | 1.329963  | 0.487493  |
| C | -1.210912 | -0.220983 | 0.020099  |
| H | -1.272211 | -0.736514 | 0.982133  |
| H | -1.269338 | -0.970091 | -0.762609 |
| H | -2.074481 | 0.426735  | -0.076937 |

piperidine, HF/6-31+G\*

|   |           |           |           |
|---|-----------|-----------|-----------|
| H | -0.765655 | -2.227696 | 0.000000  |
| N | -0.678315 | -1.230897 | 0.000000  |
| C | -0.015759 | -0.778275 | 1.211852  |
| C | -0.015759 | -0.778275 | -1.211852 |
| C | -0.015759 | 0.747397  | 1.260446  |
| H | 1.016896  | -1.139857 | 1.271134  |
| H | -0.548327 | -1.181733 | 2.066396  |
| H | -0.548327 | -1.181733 | -2.066396 |
| H | 1.016896  | -1.139857 | -1.271134 |
| C | -0.015759 | 0.747397  | -1.260446 |
| H | -1.043123 | 1.093574  | 1.339108  |
| H | 0.511006  | 1.087542  | 2.148551  |
| C | 0.629439  | 1.330659  | 0.000000  |
| H | 0.511006  | 1.087542  | -2.148551 |
| H | -1.043123 | 1.093574  | -1.339108 |
| H | 0.548908  | 2.414390  | 0.000000  |
| H | 1.693627  | 1.097115  | 0.000000  |

thiolate (SH<sup>-</sup>)

|   |          |          |           |
|---|----------|----------|-----------|
| H | 0.000000 | 0.000000 | -1.267911 |
| S | 0.000000 | 0.000000 | 0.085771  |

fluorobenzene

|   |    |               |               |
|---|----|---------------|---------------|
| F | 0. | 0.            | 2.2928493848  |
| C | 0. | 0.            | 0.9236174374  |
| C | 0. | 0.            | -1.8385931052 |
| C | 0. | 1.2217247818  | 0.2609331681  |
| C | 0. | -1.2217247818 | 0.2609331681  |
| C | 0. | -1.2112332281 | -1.1379456878 |
| C | 0. | 1.2112332281  | -1.1379456878 |
| H | 0. | 2.146994419   | 0.8305650693  |
| H | 0. | -2.146994419  | 0.8305650693  |
| H | 0. | -2.154978488  | -1.6784788847 |

H 0. 2.154978488 -1.6784788847  
H 0. 0. -2.9258125895

6,6-difluorocyclohexadienyl-

F -1.7599988856 -0.0000000505 1.1030058258  
C -0.7462032102 -0.0000000577 -0.0000012857  
F -1.7600049448 -0.0000000885 -1.1030009134  
C 0.0213254414 -1.2157881094 -0.0000035036  
C 0.0213252911 1.2157882787 -0.0000035793  
H -0.5290404412 2.1554022606 -0.0000044372  
C 1.4141604014 1.1992936705 0.000000206  
H -0.5290403737 -2.1554020538 -0.0000042333  
C 1.4141604037 -1.1992936185 0.0000003322  
C 2.1453456378 0.000000028 0.0000012198  
H 1.9417246706 2.1559610951 -0.0000001328  
H 1.9417245024 -2.1559611338 0.0000001126  
H 3.2339823238 -0.00000003 0.0000041417

1,3-dinitrobenzene

H -2.1671241609 0. -2.0699118435  
C -1.2162205276 0. -1.5474010116  
C 1.1829058014 0. -0.1542567672  
C -1.1829058014 0. -0.1542567672  
C 0. 0. -2.2356947214  
C 1.2162205276 0. -1.5474010116  
C 0. 0. 0.5788568669  
N -2.4626259463 0. 0.5872962431  
H 0. 0. -3.3226852202  
H 2.1671241609 0. -2.0699118435  
H 0. 0. 1.6629076385  
N 2.4626259463 0. 0.5872962431  
O -3.5101359632 0. -0.0826922905  
O -2.4044738588 0. 1.8288406866  
O 2.4044738588 0. 1.8288406866  
O 3.5101359632 0. -0.0826922905

6-fluoro-1,3-dinitrocyclohexadienide-

F 1.1470280336 0.3021958264 -2.3885631243  
C 1.2819627611 0.7969500395 -0.9825204602  
C -0.0579540996 0.9725585491 -0.4070491045  
H 1.8032531783 1.7425652418 -1.1353415733  
C 2.0607396198 -0.2079067507 -0.2293190257  
C 1.4532355009 -1.1713554294 0.5261861562  
H 3.1387164154 -0.2335529957 -0.3777832332  
C -0.6912703465 -0.0135148367 0.3309540907  
N -0.7776644601 2.1585649645 -0.7516195225  
C 0.0458990736 -1.1164177818 0.7559690068  
H 2.0318747916 -1.9564623099 1.0042046159  
H -1.7323144297 0.0974011668 0.6162880964  
N -0.578156438 -2.1203765374 1.547721543

|   |               |               |               |
|---|---------------|---------------|---------------|
| O | -1.9555234994 | 2.3082618731  | -0.3390533357 |
| O | -0.1912899446 | 3.0289724564  | -1.4475314055 |
| O | -1.8170272783 | -2.0568081936 | 1.7618971376  |
| O | 0.1351268439  | -3.0552905447 | 2.0061453647  |

4-nitrofluorobenzene

|   |               |               |               |
|---|---------------|---------------|---------------|
| F | -0.0004734247 | 3.4202882906  | 0.            |
| C | -0.0002525376 | 2.0578589447  | 0.            |
| C | -0.0001369118 | 1.3925700858  | 1.2219215649  |
| H | -0.00023786   | 1.9603793374  | 2.1480052336  |
| C | 0.0000841729  | -0.0028522357 | 1.2238853406  |
| C | 0.0002342355  | -0.672836658  | 0.            |
| H | 0.0001699045  | -0.5631133207 | 2.1529400353  |
| C | 0.0000841729  | -0.0028522357 | -1.2238853406 |
| N | 0.0004577319  | -2.1447261821 | 0.            |
| C | -0.0001369118 | 1.3925700858  | -1.2219215649 |
| H | 0.0001699045  | -0.5631133207 | -2.1529400353 |
| H | -0.00023786   | 1.9603793374  | -2.1480052336 |
| O | 0.0001209556  | -2.721924456  | -1.1027270675 |
| O | 0.0001209556  | -2.721924456  | 1.1027270675  |

4-nitrophenylfluoride, C3 fluoride adduct

|   |               |               |               |
|---|---------------|---------------|---------------|
| C | -1.9467899079 | 0.317288479   | -0.6141750432 |
| C | -1.4063543225 | 1.4123587722  | 0.0959282146  |
| F | -3.2408759595 | 0.4689031763  | -1.0977900445 |
| C | 0.6782871248  | 0.1851649362  | 0.1180320974  |
| C | -0.0669110634 | 1.3312070611  | 0.4399371582  |
| H | -2.017676507  | 2.2811394608  | 0.3210043525  |
| N | 2.0717765395  | 0.1741355638  | 0.3532934091  |
| H | 0.4385193723  | 2.167104999   | 0.9161137272  |
| O | 2.725659937   | -0.8814222433 | 0.1167064027  |
| O | 2.6405861316  | 1.2253083197  | 0.7703505601  |
| C | -1.2653338207 | -0.8238316456 | -0.9226300484 |
| C | 0.0397916851  | -1.0613402652 | -0.2943194206 |
| F | -0.2046349878 | -1.9422886043 | 0.9449802248  |
| H | 0.7014219656  | -1.7179648159 | -0.858396619  |
| H | -1.7412088027 | -1.6049323754 | -1.5095803979 |

4-nitrofluorobenzene + F-, C1 fluoride adduct

|   |           |           |           |
|---|-----------|-----------|-----------|
| F | 1.098481  | -2.788469 | 0.000000  |
| C | -0.000158 | -1.847212 | 0.000000  |
| C | 0.000182  | -1.065801 | 1.234004  |
| H | 0.000202  | -1.622148 | 2.168885  |
| C | 0.000182  | 0.306360  | 1.222031  |
| C | 0.000180  | 1.021891  | 0.000000  |
| H | 0.000315  | 0.863386  | 2.155001  |
| C | 0.000182  | 0.306360  | -1.222031 |
| N | 0.000206  | 2.426432  | 0.000000  |
| C | 0.000182  | -1.065801 | -1.234004 |
| H | 0.000315  | 0.863386  | -2.155001 |



|   |           |           |           |
|---|-----------|-----------|-----------|
| H | 0.000202  | -1.622148 | -2.168885 |
| O | 0.000246  | 3.048848  | -1.105344 |
| O | 0.000246  | 3.048848  | 1.105344  |
| F | -1.099696 | -2.787515 | 0.000000  |

1-fluoro-2,4-dinitrobenzene

|   |               |    |               |
|---|---------------|----|---------------|
| C | 0.9696723272  | 0. | -1.3886845063 |
| C | 0.4259664659  | 0. | 1.3136725507  |
| C | -0.3595115292 | 0. | -0.9443288646 |
| C | 2.0183278118  | 0. | -0.468716175  |
| C | 1.7569737632  | 0. | 0.8978455967  |
| C | -0.6382903703 | 0. | 0.4225278856  |
| N | -1.5081824989 | 0. | -1.8716733205 |
| H | 3.0362669859  | 0. | -0.8488744743 |
| H | 2.5611271677  | 0. | 1.6262751915  |
| H | -1.6657564309 | 0. | 0.7694516599  |
| N | 0.1301317864  | 0. | 2.7594295034  |
| O | -1.2687110592 | 0. | -3.0906943936 |
| O | -2.6402250985 | 0. | -1.3593037763 |
| O | -1.0648498229 | 0. | 3.100284758   |
| O | 1.1003131512  | 0. | 3.5371857702  |
| F | 1.295963232   | 0. | -2.6949803829 |

2,4-dinitrophenyl fluoride, C1 fluoride adduct

|   |           |           |           |
|---|-----------|-----------|-----------|
| C | -0.028910 | -1.949257 | -0.000105 |
| C | -1.194208 | -1.044986 | 0.000004  |
| F | -2.027050 | -1.376702 | -1.101977 |
| C | -0.812607 | 0.381443  | -0.000092 |
| F | -2.026808 | -1.376680 | 1.102188  |
| H | -0.268078 | -3.010321 | -0.000095 |
| C | 1.261649  | -1.512770 | -0.000159 |
| N | -1.851410 | 1.371989  | -0.000065 |
| C | 0.504605  | 0.806205  | -0.000140 |
| H | 2.084396  | -2.221389 | -0.000215 |
| H | 0.714897  | 1.870688  | -0.000173 |
| C | 1.546051  | -0.115962 | -0.000199 |
| N | 2.893637  | 0.331708  | -0.000247 |
| O | -3.042654 | 0.982933  | 0.000253  |
| O | -1.530954 | 2.586538  | -0.000133 |
| O | 3.813048  | -0.533114 | 0.000248  |
| O | 3.135365  | 1.567086  | 0.000245  |

2,4-dinitrophenyl fluoride, C3 adduct

|   |           |           |           |
|---|-----------|-----------|-----------|
| C | 0.118655  | 2.154056  | 0.158847  |
| C | 1.202644  | 1.279838  | 0.075336  |
| F | 2.443007  | 1.852136  | 0.085432  |
| C | 1.038574  | -0.095557 | -0.055875 |
| H | 0.300733  | 3.217330  | 0.279540  |
| C | -1.168106 | 1.629141  | 0.018089  |
| N | 2.118048  | -0.991584 | -0.316630 |

|   |           |           |           |
|---|-----------|-----------|-----------|
| H | -2.030494 | 2.286061  | -0.058647 |
| C | -1.351866 | 0.259401  | -0.078670 |
| N | -2.657175 | -0.266365 | -0.315427 |
| O | 3.224822  | -0.532880 | -0.692398 |
| O | 1.901110  | -2.223208 | -0.185176 |
| O | -3.613161 | 0.530178  | -0.505323 |
| O | -2.804204 | -1.515000 | -0.340308 |
| C | -0.275576 | -0.688726 | 0.243506  |
| H | -0.402120 | -1.665029 | -0.218898 |
| F | -0.348421 | -1.000398 | 1.696863  |

2,4-dinitrophenyl fluoride, C5 adduct

|   |           |           |           |
|---|-----------|-----------|-----------|
| C | -0.044298 | -1.882076 | -0.451007 |
| C | -1.183379 | -1.147534 | -0.324884 |
| F | -2.372051 | -1.749114 | -0.638621 |
| C | -1.161569 | 0.255693  | -0.054315 |
| H | -0.118411 | -2.923407 | -0.752137 |
| N | -2.342183 | 1.017696  | 0.183488  |
| C | 1.241612  | 0.150395  | -0.149919 |
| N | 2.499523  | 0.827926  | -0.190157 |
| O | -3.391994 | 0.414986  | 0.519437  |
| O | -2.284691 | 2.268137  | 0.060544  |
| O | 3.544782  | 0.131396  | -0.266643 |
| O | 2.524874  | 2.083890  | -0.172034 |
| C | 0.080247  | 0.889189  | -0.014708 |
| H | 0.127038  | 1.968183  | 0.091768  |
| C | 1.256915  | -1.316589 | -0.058133 |
| H | 2.102042  | -1.766030 | -0.579646 |
| F | 1.539497  | -1.704201 | 1.357961  |

2,4-dinitrophenyl fluoride, C6 adduct

|   |           |           |           |
|---|-----------|-----------|-----------|
| C | 1.140984  | 0.948767  | -0.317525 |
| F | 2.395243  | 1.457932  | -0.485449 |
| C | 0.964321  | -0.402561 | -0.028634 |
| N | 2.100250  | -1.306003 | 0.047682  |
| C | -1.382734 | -0.090403 | -0.093986 |
| N | -2.726844 | -0.660685 | -0.101467 |
| O | 2.059060  | -2.209366 | 0.910920  |
| O | 3.039042  | -1.151809 | -0.761042 |
| O | -3.682655 | 0.071973  | -0.436538 |
| O | -2.867539 | -1.858002 | 0.232282  |
| C | -0.312121 | -0.959469 | 0.117006  |
| H | -0.446796 | -2.006049 | 0.359673  |
| C | -1.223621 | 1.262421  | -0.405943 |
| H | -2.094646 | 1.875963  | -0.607353 |
| C | 0.058117  | 1.868284  | -0.264357 |
| F | 0.143416  | 2.595685  | 1.347842  |
| H | 0.226723  | 2.829740  | -0.741712 |

1-fluoro-2,4-dinitrobenzene + dimethylamine, ts, HF/6-31+G\*

|   |           |           |           |
|---|-----------|-----------|-----------|
| N | 3.234992  | -0.218913 | 0.170351  |
| C | 1.836825  | -0.243124 | -0.145530 |
| C | 1.254326  | -1.414796 | -0.681007 |
| C | 1.077681  | 0.886540  | 0.020976  |
| C | -0.277174 | 0.861249  | -0.268181 |
| H | 1.521291  | 1.796128  | 0.371437  |
| H | 1.878377  | -2.262053 | -0.886889 |
| C | -0.065099 | -1.457300 | -0.974663 |
| N | -1.038961 | 2.052076  | -0.050011 |
| H | -0.501142 | -2.315594 | -1.448752 |
| O | 3.862360  | -1.225649 | -0.009186 |
| O | 3.701288  | 0.797200  | 0.601025  |
| C | -0.932799 | -0.337692 | -0.706522 |
| N | -2.135189 | -0.871780 | 0.663495  |
| F | -1.927256 | -0.202597 | -1.591182 |
| C | -1.470411 | -1.010652 | 1.958701  |
| C | -2.915254 | -2.060300 | 0.307373  |
| H | -2.738691 | -0.068671 | 0.678767  |
| O | -2.237715 | 1.941849  | 0.039127  |
| O | -0.459477 | 3.089774  | 0.062064  |
| H | -0.977893 | -0.085127 | 2.217845  |
| H | -0.732533 | -1.799674 | 1.896444  |
| H | -2.252628 | -2.911122 | 0.219209  |
| H | -3.418264 | -1.896926 | -0.633556 |
| H | -2.186176 | -1.255834 | 2.735568  |
| H | -3.653144 | -2.276366 | 1.072593  |

1-fluoro-2,4-dinitrobenzene + piperidine, ts, HF/6-31+G\*

|   |           |           |           |
|---|-----------|-----------|-----------|
| N | -3.548757 | -1.190241 | -0.351809 |
| C | -2.333482 | -0.614424 | 0.145711  |
| C | -1.589284 | -1.288355 | 1.141177  |
| C | -1.923445 | 0.613415  | -0.305581 |
| C | -0.741200 | 1.165194  | 0.162341  |
| H | -2.509856 | 1.157797  | -1.017319 |
| H | -1.967631 | -2.206328 | 1.545881  |
| C | -0.435670 | -0.763211 | 1.612475  |
| N | -0.334118 | 2.434245  | -0.358467 |
| H | 0.100635  | -1.230822 | 2.415626  |
| O | -3.877428 | -2.257894 | 0.085891  |
| O | -4.167039 | -0.582953 | -1.179133 |
| C | 0.101736  | 0.464683  | 1.085642  |
| N | 1.725850  | 0.020510  | 0.159140  |
| F | 0.767983  | 1.193259  | 1.985581  |
| C | 1.480882  | -0.702462 | -1.096535 |
| C | 2.714402  | -0.662374 | 1.010610  |
| H | 2.051006  | 0.949354  | -0.047269 |
| O | 0.822801  | 2.749840  | -0.227145 |
| O | -1.144525 | 3.107787  | -0.920689 |
| H | 0.773151  | -0.131902 | -1.682182 |

|   |          |           |           |
|---|----------|-----------|-----------|
| H | 1.011985 | -1.646016 | -0.838239 |
| C | 2.767100 | -0.940556 | -1.886066 |
| C | 4.036702 | -0.895216 | 0.279911  |
| H | 2.284406 | -1.612198 | 1.309972  |
| H | 2.862301 | -0.065506 | 1.899369  |
| H | 2.532713 | -1.522247 | -2.772348 |
| C | 3.817045 | -1.651409 | -1.030997 |
| H | 3.157370 | 0.014629  | -2.231496 |
| H | 4.707667 | -1.443626 | 0.934518  |
| H | 4.509270 | 0.064109  | 0.078723  |
| H | 4.751030 | -1.739195 | -1.576688 |
| H | 3.484087 | -2.664922 | -0.814354 |

2,4-dinitrophenyl fluoride + SH<sup>-</sup>, transition state, HF/6-31+G\*

|   |           |           |           |
|---|-----------|-----------|-----------|
| S | -2.032759 | -1.678186 | 1.408809  |
| C | -1.027625 | -0.633875 | -0.672602 |
| F | -2.153433 | -0.784010 | -1.332271 |
| C | -0.021650 | -1.599682 | -0.969211 |
| C | 1.279285  | -1.362245 | -0.689319 |
| H | -0.354230 | -2.538815 | -1.364188 |
| C | 1.660299  | -0.116182 | -0.139797 |
| H | 2.024833  | -2.107070 | -0.882338 |
| N | 3.034562  | 0.134833  | 0.167528  |
| C | 0.730639  | 0.878230  | 0.050182  |
| H | 1.023485  | 1.833007  | 0.431001  |
| C | -0.596733 | 0.656901  | -0.276369 |
| N | -1.522912 | 1.736424  | -0.068416 |
| O | -1.083550 | 2.774905  | 0.363187  |
| O | -2.669032 | 1.571553  | -0.348822 |
| O | 3.341592  | 1.207051  | 0.615039  |
| O | 3.828909  | -0.745288 | -0.039718 |
| H | -0.859236 | -1.783513 | 2.036458  |

1-chloro-2,4-dinitrobenzene

|    |               |    |               |
|----|---------------|----|---------------|
| C  | 0.8611778853  | 0. | -1.1484829572 |
| C  | 0.3015746862  | 0. | 1.5826048948  |
| C  | -0.4677581167 | 0. | -0.6845572168 |
| C  | 1.8923883836  | 0. | -0.1935377561 |
| C  | 1.6324927076  | 0. | 1.1717952387  |
| C  | -0.7528009642 | 0. | 0.6826396343  |
| N  | -1.6525136019 | 0. | -1.5787106684 |
| H  | 2.9192168105  | 0. | -0.5491985727 |
| H  | 2.4374437187  | 0. | 1.8994881615  |
| H  | -1.7813315061 | 0. | 1.0245486588  |
| N  | -0.0043235047 | 0. | 3.0260087143  |
| O  | -1.4590514905 | 0. | -2.8047992838 |
| O  | -2.76862261   | 0. | -1.0322947066 |
| O  | -1.2016193847 | 0. | 3.3591475106  |
| O  | 0.9612010458  | 0. | 3.8098632867  |
| Cl | 1.3508719264  | 0. | -2.8014135323 |

1-chloro-2,4-dinitrobenzene + dimethylamine, ts, HF/6-31+G\*

|    |           |           |           |
|----|-----------|-----------|-----------|
| N  | 3.388071  | -0.225751 | 0.035246  |
| C  | 1.970114  | -0.253784 | -0.163103 |
| C  | 1.338450  | -1.439259 | -0.602030 |
| C  | 1.227096  | 0.881975  | 0.025498  |
| C  | -0.147249 | 0.856297  | -0.149290 |
| H  | 1.697869  | 1.800042  | 0.312474  |
| H  | 1.936336  | -2.301553 | -0.823150 |
| C  | 0.000872  | -1.481522 | -0.792574 |
| N  | -0.866524 | 2.062583  | 0.128750  |
| H  | -0.458822 | -2.357678 | -1.206038 |
| O  | 3.995928  | -1.242426 | -0.157205 |
| O  | 3.891661  | 0.803063  | 0.387622  |
| C  | -0.854251 | -0.345116 | -0.510599 |
| N  | -1.921220 | -0.838213 | 0.985184  |
| Cl | -2.188415 | -0.190943 | -1.681742 |
| C  | -1.136650 | -0.766387 | 2.220642  |
| C  | -2.582882 | -2.139479 | 0.845537  |
| H  | -2.604612 | -0.102014 | 0.985319  |
| O  | -2.040765 | 1.965104  | 0.390012  |
| O  | -0.273109 | 3.099041  | 0.129428  |
| H  | -0.774190 | 0.238152  | 2.369938  |
| H  | -0.297039 | -1.444711 | 2.146143  |
| H  | -1.832790 | -2.917507 | 0.807182  |
| H  | -3.172423 | -2.161318 | -0.057504 |
| H  | -1.745613 | -1.047896 | 3.072373  |
| H  | -3.230671 | -2.324435 | 1.695284  |

1-chloro-2,4-dinitrobenzene + piperidine, ts, HF/6-31+G\*

|    |           |           |           |
|----|-----------|-----------|-----------|
| N  | -3.609641 | -1.264426 | -0.110417 |
| C  | -2.375602 | -0.617811 | 0.222082  |
| C  | -1.620484 | -1.059143 | 1.332415  |
| C  | -1.948738 | 0.462051  | -0.504555 |
| C  | -0.747189 | 1.081274  | -0.196894 |
| H  | -2.534541 | 0.837851  | -1.318371 |
| H  | -2.000848 | -1.853858 | 1.943634  |
| C  | -0.454064 | -0.458959 | 1.657329  |
| N  | -0.333340 | 2.162556  | -1.040025 |
| H  | 0.072455  | -0.745133 | 2.546507  |
| O  | -3.949300 | -2.195113 | 0.566893  |
| O  | -4.233357 | -0.850818 | -1.046508 |
| C  | 0.104763  | 0.617510  | 0.864915  |
| N  | 1.692485  | -0.089285 | 0.041145  |
| Cl | 0.920500  | 1.844814  | 1.862693  |
| C  | 1.353114  | -0.954927 | -1.100474 |
| C  | 2.613061  | -0.762677 | 0.974254  |
| H  | 2.111501  | 0.757074  | -0.303678 |
| O  | 0.841454  | 2.435033  | -1.064869 |
| O  | -1.154888 | 2.718139  | -1.706403 |

|   |          |           |           |
|---|----------|-----------|-----------|
| H | 0.700107 | -0.405378 | -1.761496 |
| H | 0.797426 | -1.799489 | -0.707855 |
| C | 2.596422 | -1.427640 | -1.853065 |
| C | 3.895876 | -1.222452 | 0.281225  |
| H | 2.086403 | -1.616391 | 1.385301  |
| H | 2.837115 | -0.083848 | 1.783622  |
| H | 2.286552 | -2.095348 | -2.651059 |
| C | 3.585056 | -2.120690 | -0.915745 |
| H | 3.072987 | -0.572247 | -2.327359 |
| H | 4.514882 | -1.743179 | 1.005785  |
| H | 4.460466 | -0.351329 | -0.045075 |
| H | 4.497396 | -2.370986 | -1.447443 |
| H | 3.158512 | -3.058630 | -0.565025 |

6-mercapto-6-chloro-1,3-dinitrocyclohexadienide-, ts, HF

|    |           |           |           |
|----|-----------|-----------|-----------|
| S  | -1.764362 | -1.390690 | 1.822913  |
| C  | -0.942068 | -0.550704 | -0.449096 |
| Cl | -2.471719 | -0.741334 | -1.265151 |
| C  | -0.008824 | -1.598705 | -0.736810 |
| C  | 1.322839  | -1.436333 | -0.573834 |
| H  | -0.413064 | -2.543834 | -1.037379 |
| C  | 1.825841  | -0.184141 | -0.156861 |
| H  | 1.997462  | -2.246892 | -0.762900 |
| N  | 3.233796  | -0.005368 | 0.027561  |
| C  | 0.978173  | 0.880247  | 0.019348  |
| H  | 1.359950  | 1.838056  | 0.299380  |
| C  | -0.385793 | 0.728547  | -0.182377 |
| N  | -1.192446 | 1.902273  | 0.038803  |
| O  | -0.617413 | 2.957231  | 0.172291  |
| O  | -2.376756 | 1.792861  | 0.075490  |
| O  | 3.641285  | 1.072307  | 0.368776  |
| O  | 3.952012  | -0.950183 | -0.171380 |
| H  | -0.518825 | -1.483123 | 2.293655  |

1-bromo-2,4-dinitrobenzene

|   |               |    |               |
|---|---------------|----|---------------|
| C | 0.6388133795  | 0. | -0.6846488895 |
| C | 0.0804263585  | 0. | 2.0457298648  |
| C | -0.688282513  | 0. | -0.2208376027 |
| C | 1.6711847624  | 0. | 0.2698015195  |
| C | 1.4112291122  | 0. | 1.6357548294  |
| C | -0.9746693978 | 0. | 1.1463878075  |
| N | -1.8767056202 | 0. | -1.1141763653 |
| H | 2.6996038414  | 0. | -0.0807679375 |
| H | 2.2161110172  | 0. | 2.3636031522  |
| H | -2.0027212959 | 0. | 1.4896662486  |
| N | -0.2255836328 | 0. | 3.4892706906  |
| O | -1.6881769991 | 0. | -2.340660587  |
| O | -2.9908567717 | 0. | -0.5637226676 |
| O | -1.4227987509 | 0. | 3.8226623862  |
| O | 0.7399376418  | 0. | 4.2730364465  |

Br 1.1961708582 0. -2.4880517583

1-bromo-2,4-dinitrobenzene + dimethylamine, ts, HF/6-31+G\*

|    |           |           |           |
|----|-----------|-----------|-----------|
| N  | 3.687129  | -0.277853 | -0.210365 |
| C  | 2.254275  | -0.282913 | -0.218152 |
| C  | 1.551434  | -1.476564 | -0.495482 |
| C  | 1.562768  | 0.878115  | 0.005266  |
| C  | 0.176140  | 0.874645  | 0.014401  |
| H  | 2.082602  | 1.798546  | 0.176559  |
| H  | 2.099730  | -2.365328 | -0.739039 |
| C  | 0.199113  | -1.494580 | -0.506244 |
| C  | -0.586807 | -0.325043 | -0.180330 |
| N  | -0.479437 | 2.109465  | 0.327008  |
| H  | -0.324664 | -2.384305 | -0.795057 |
| Br | -2.192806 | -0.191448 | -1.282932 |
| N  | -1.482786 | -0.718769 | 1.464710  |
| C  | -0.568996 | -0.549019 | 2.597418  |
| C  | -2.127197 | -2.035691 | 1.494715  |
| H  | -2.177155 | 0.005952  | 1.490541  |
| O  | 4.246924  | -1.317276 | -0.424537 |
| O  | 4.249749  | 0.755828  | 0.015047  |
| O  | 0.130078  | 3.130224  | 0.210236  |
| O  | -1.614145 | 2.050785  | 0.732275  |
| H  | -0.215789 | 0.468900  | 2.638693  |
| H  | 0.272851  | -1.217867 | 2.475672  |
| H  | -1.367545 | -2.804686 | 1.462549  |
| H  | -2.789961 | -2.147299 | 0.651215  |
| H  | -1.073245 | -0.781276 | 3.528950  |
| H  | -2.698183 | -2.152056 | 2.409363  |

1-bromo-2,4-dinitrobenzene + piperidine, ts, HF/6-31+G\*

|    |           |           |           |
|----|-----------|-----------|-----------|
| N  | -3.854889 | 1.120851  | -0.345607 |
| C  | -2.552638 | 0.522943  | -0.383108 |
| C  | -1.766732 | 0.611711  | -1.553941 |
| C  | -2.082474 | -0.164270 | 0.704010  |
| C  | -0.814289 | -0.726476 | 0.679535  |
| H  | -2.684411 | -0.273657 | 1.582834  |
| H  | -2.170878 | 1.090213  | -2.424238 |
| C  | -0.536131 | 0.053479  | -1.600198 |
| C  | 0.054547  | -0.596163 | -0.452785 |
| N  | -0.361725 | -1.373867 | 1.874943  |
| H  | 0.021783  | 0.055592  | -2.515499 |
| Br | 1.109541  | -2.154801 | -0.965678 |
| N  | 1.547227  | 0.511075  | 0.094435  |
| C  | 1.082746  | 1.681646  | 0.856057  |
| C  | 2.445827  | 0.907034  | -1.002806 |
| H  | 2.023451  | -0.116698 | 0.718295  |
| O  | -4.227069 | 1.702006  | -1.327186 |
| O  | -4.498874 | 1.017021  | 0.659570  |
| O  | -1.170627 | -1.708847 | 2.688399  |

|   |          |           |           |
|---|----------|-----------|-----------|
| O | 0.827185 | -1.515581 | 2.017311  |
| C | 2.246066 | 2.499280  | 1.417008  |
| H | 0.445238 | 1.337297  | 1.656425  |
| H | 0.480028 | 2.283041  | 0.184089  |
| C | 3.654391 | 1.693679  | -0.496100 |
| H | 1.868266 | 1.516132  | -1.689096 |
| H | 2.761501 | 0.017756  | -1.526666 |
| H | 2.767404 | 1.908224  | 2.167068  |
| H | 1.845565 | 3.369659  | 1.927655  |
| C | 3.218390 | 2.914968  | 0.313034  |
| H | 4.274299 | 1.042948  | 0.117442  |
| H | 4.259211 | 1.989917  | -1.348012 |
| H | 4.082422 | 3.414220  | 0.739584  |
| H | 2.734767 | 3.633187  | -0.346514 |

2,4-dinitrophenyl bromide + SH<sup>-</sup>, transition state, HF/6-31+G\*

|    |           |           |           |
|----|-----------|-----------|-----------|
| S  | -1.299411 | -0.928339 | 2.256148  |
| C  | -0.634979 | -0.413555 | -0.166755 |
| Br | -2.407634 | -0.573113 | -0.844768 |
| C  | 0.171786  | -1.568882 | -0.413762 |
| C  | 1.522935  | -1.513048 | -0.398696 |
| H  | -0.331914 | -2.504100 | -0.549057 |
| C  | 2.165489  | -0.275415 | -0.179450 |
| H  | 2.106171  | -2.399117 | -0.549093 |
| N  | 3.595461  | -0.209755 | -0.142617 |
| C  | 1.431087  | 0.876043  | -0.052709 |
| H  | 1.915558  | 1.818972  | 0.081098  |
| C  | 0.045779  | 0.827227  | -0.115104 |
| N  | -0.634335 | 2.085265  | 0.075112  |
| O  | 0.025016  | 3.094391  | -0.015698 |
| O  | -1.799878 | 2.081015  | 0.311116  |
| O  | 4.121570  | 0.855303  | 0.037198  |
| O  | 4.210258  | -1.232432 | -0.295625 |
| H  | -0.028244 | -1.112392 | 2.621009  |



$^1\text{H}$  NMR of 1,2,4-trinitrobenzene in  $\text{CDCl}_3$  with 0.05% v/v TMS

1-2-4-trinitrobenzene (June6)

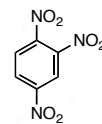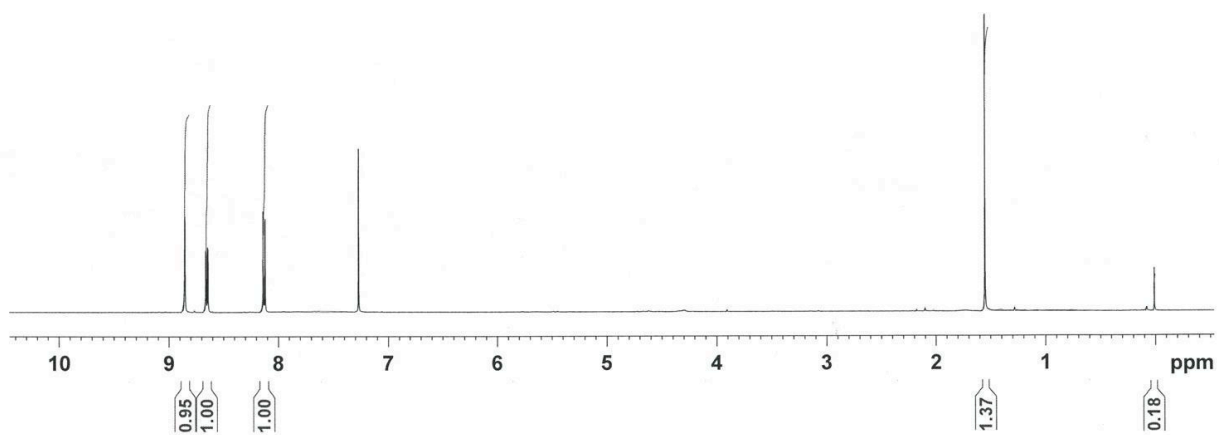

Supplement: NIHMS415926-supplement-1_si_001.pdf [file NIHMS415926-supplement-1_si_001.pdf]
